# Supplementary material
Source: ML conference proceedings conference paper supplement (https://proceedings.neurips.cc/paper_files/paper/2019/hash/791d3a0048b9c200dceca07f99ddd178-Abstract.html)
Supplement: Supplementary file [file 791d3a0048b9c200dceca07f99ddd178-Supplemental.zip]

# Faster width-dependent algorithm for mixed packing and covering LPs

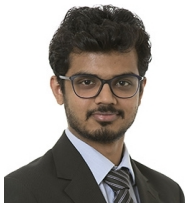

Digvijay Boob<sup>1</sup>

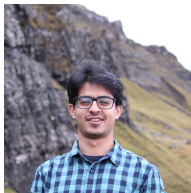

Saurabh Sawlani<sup>2</sup>

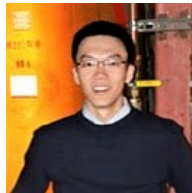

Di Wang<sup>3</sup>

<sup>1</sup>Industrial and Systems Engineering, Georgia Tech

<sup>2</sup>College of Computing, Georgia Tech

<sup>3</sup>Google Research

Oral Presentation at NeurIPS 2019

December, 2019

# Outline

- 1 Problem of interest
- 2 Technical Overview
- 3 Area Convexity
- 4 Summary

# Mixed Packing and Covering(MPC) LP

Does there exists an  $x \in \square^n := \{x \geq \mathbf{0}_n, \|x\|_\infty \leq 1\}$  such that

$$Px \leq \mathbf{1}_p, \quad (\text{Packing constraints}),$$

$$Cx \geq \mathbf{1}_c, \quad (\text{Covering Constraints}),$$

where  $P, C \geq 0$ .

**Def:** We say that  $x$  is an  $\varepsilon$ -approximate solution to the MPC problem if  $x$  satisfies  $x \in \square^n, Px \leq (1 + \varepsilon)\mathbf{1}_p, Cx \geq (1 - \varepsilon)\mathbf{1}_c$ .

# Mixed Packing and Covering(MPC) LP

Does there exists an  $x \in \square^n := \{x \geq \mathbf{0}_n, \|x\|_\infty \leq 1\}$  such that

$$Px \leq \mathbf{1}_p, \quad (\text{Packing constraints}),$$

$$Cx \geq \mathbf{1}_c, \quad (\text{Covering Constraints}),$$

where  $P, C \geq 0$ .

**Def:** We say that  $x$  is an  $\varepsilon$ -approximate solution to the MPC problem if  $x$  satisfies  $x \in \square^n, Px \leq (1 + \varepsilon)\mathbf{1}_p, Cx \geq (1 - \varepsilon)\mathbf{1}_c$ .

# Application: Optimal Transport Problem

Optimal transport is a problem of computing Wasserstein distance between two n-dimensional distributions.

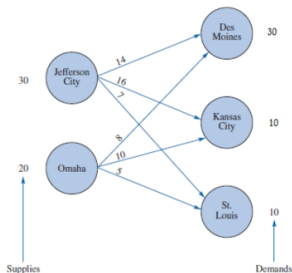

Modeled as LP:

$$\min_{C, X} C \cdot X$$

$$\text{s.t. } 0 \leq X_{ij} \leq a_i X^0_{ij} + b_j$$

# Application: Optimal Transport Problem

Optimal transport is a problem of computing Wasserstein distance between two  $n$ -dimensional distributions.

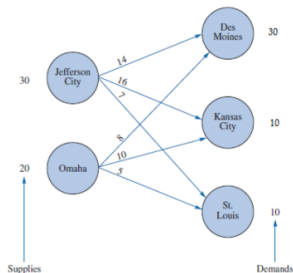

Modeled as LP:

$$\begin{aligned} \min_X & \langle C, X \rangle \\ \text{s.t. } & \{X \geq 0, X\mathbf{1} = u, X^T\mathbf{1} = v\}. \end{aligned}$$

# Motivation

## Mixed Packing-Covering LPs

Pure Packing

Bipartite matching

Pure Covering

Minimum Set Cover

Zero-sum  
Matrix Games

Optimal Transport

Multi-commodity flow

Mechanism Design

Positive Linear Systems

Scheduling

X-Ray Tomography

# Previous Results

**Def:** Width  $w$  is maximum non-zeros in any row of  $P$  or  $C$ .

Table: Runtime for obtaining  $\varepsilon$ -approximate solution:

|                       | Runtime                                | Comments        |
|-----------------------|----------------------------------------|-----------------|
| Nesterov              | $\tilde{O}(w\sqrt{n}\varepsilon^{-1})$ | width-dependent |
| Young 2014            | $\tilde{O}(\varepsilon^{-4})$          |                 |
| Mahoney <i>et al.</i> | $\tilde{O}(\varepsilon^{-3})$          |                 |
| <b>Our work</b>       | $\tilde{O}(w\varepsilon^{-1})$         | width-dependent |



# Previous Results

**Def:** Width  $w$  is maximum non-zeros in any row of  $P$  or  $C$ .

**Table:** Runtime for obtaining  $\varepsilon$ -approximate solution:

|                       | Runtime                                | Comments        |
|-----------------------|----------------------------------------|-----------------|
| Nesterov              | $\tilde{O}(w\sqrt{n}\varepsilon^{-1})$ | width-dependent |
| Young 2014            | $\tilde{O}(\varepsilon^{-4})$          |                 |
| Mahoney <i>et al.</i> | $\tilde{O}(\varepsilon^{-3})$          |                 |
| <b>Our work</b>       | $\tilde{O}(w\varepsilon^{-1})$         | width-dependent |

# Saddle Point Problem (SPP) Reformulation

- Reformulate the MPC problem as a SPP:

$$\min_{x \in \square^n} \max_{y \in \Delta^p, z \in \Delta^c} L(x, y, z)$$

- $u := (x, y, z)$  and  $\mathcal{U} := \square^n \times \Delta^p \times \Delta^c$ .
- Convergence:  $u \in \mathcal{U}$  s.t. **primal-dual gap**  
 $\text{Gap}(u) := \sup_{\bar{u} \in \mathcal{U}} L(x, \bar{y}, \bar{z}) - L(\bar{x}, y, z)$  is small ( $Q(u) \leq \varepsilon$ ).
- $u$  is  $\varepsilon$ -SPP then either
  - $x$  is an  $\varepsilon$ -approx solution to MPC, or
  - We obtain a certificate of infeasibility.

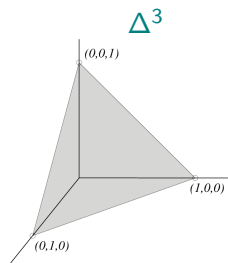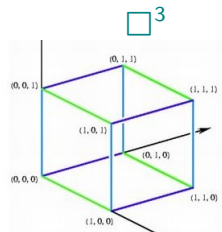

# Saddle Point Problem (SPP) Reformulation

- Reformulate the MPC problem as a SPP:

$$\min_{x \in \square^n} \max_{y \in \Delta^p, z \in \Delta^c} L(x, y, z)$$

- $u := (x, y, z)$  and  $\mathcal{U} := \square^n \times \Delta^p \times \Delta^c$ .
- Convergence:  $u \in \mathcal{U}$  s.t. **primal-dual gap**  
 $\text{Gap}(u) := \sup_{\bar{u} \in \mathcal{U}} L(x, \bar{y}, \bar{z}) - L(\bar{x}, y, z)$  is small ( $Q(u) \leq \varepsilon$ ).
- $u$  is  $\varepsilon$ -SPP then either
  - $x$  is an  $\varepsilon$ -approx solution to MPC, or
  - We obtain a certificate of infeasibility.

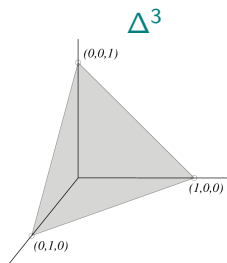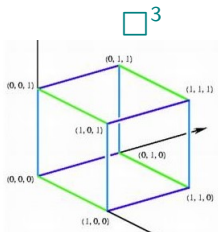

# Saddle Point Problem (SPP) Reformulation

- Reformulate the MPC problem as a SPP:

$$\min_{x \in \square^n} \max_{y \in \Delta^p, z \in \Delta^c} L(x, y, z)$$

- $u := (x, y, z)$  and  $\mathcal{U} := \square^n \times \Delta^p \times \Delta^c$ .
- Convergence:  $u \in \mathcal{U}$  s.t. **primal-dual gap**  
 $\text{Gap}(u) := \sup_{\bar{u} \in \mathcal{U}} L(x, \bar{y}, \bar{z}) - L(\bar{x}, y, z)$  is small ( $Q(u) \leq \varepsilon$ ).
- $u$  is  $\varepsilon$ -SPP then either
  - $x$  is an  $\varepsilon$ -approx solution to MPC, or
  - We obtain a certificate of infeasibility.



# Saddle Point Problem (SPP) Reformulation

- Reformulate the MPC problem as a SPP:

$$\min_{x \in \square^n} \max_{y \in \Delta^p, z \in \Delta^c} L(x, y, z)$$

- $u := (x, y, z)$  and  $\mathcal{U} := \square^n \times \Delta^p \times \Delta^c$ .
- Convergence:  $u \in \mathcal{U}$  s.t. **primal-dual gap**  
 $\text{Gap}(u) := \sup_{\bar{u} \in \mathcal{U}} L(x, \bar{y}, \bar{z}) - L(\bar{x}, y, z)$  is small ( $Q(u) \leq \varepsilon$ ).
- $u$  is  $\varepsilon$ -SPP then either
  - $x$  is an  $\varepsilon$ -approx solution to MPC, or
  - We obtain a certificate of infeasibility.



# Standard Methods

- General Problem:  $\min_{w \in X} f(w)$
- Regularized problem:  $\min_{w \in X} f(w) + \phi(w)$
- $\phi$  is strongly convex on  $X$ .
- Rate of convergence: e.g. Nesterov's accelerated methods:  
 $\frac{1}{\epsilon} \times \text{range of } \phi \text{ on set } X.$

# Standard Methods

- General Problem:  $\min_{w \in X} f(w)$
- Regularized problem:  $\min_{w \in X} f(w) + \phi(w)$
- $\phi$  is strongly convex on  $X$ .
- Rate of convergence: e.g. Nesterov's accelerated methods:  
 $\frac{1}{\epsilon} \times \text{range of } \phi \text{ on set } X.$

# Standard Methods

- General Problem:  $\min_{w \in X} f(w)$
- Regularized problem:  $\min_{w \in X} f(w) + \phi(w)$
- $\phi$  is strongly convex on  $X$ .
- Rate of convergence: e.g. Nesterov's accelerated methods:  
 $\frac{1}{\epsilon} \times \text{range of } \phi \text{ on set } X.$



# Standard Methods + MPC

- General Problem:  $\min_{w \in X} f(w) + \phi(w)$
- For the case of MPC problems:
  - 1  $f$  is primal-dual gap  $Q$ .
  - 2  $w$  is joint primal-dual variable  $u$ .
  - 3  $X$  is joint domain  $\mathcal{U}(= \square^n \times \Delta^p \times \Delta^c)$ .
  - 4  $\phi$  is strongly convex regularizers  $\phi_1(x) + \phi_2(y) + \phi_3(z)$ .
- Algorithm of choice: Nesterov's Dual Extrapolation
- Range of regularizers  $\tilde{\Theta}(w\sqrt{n})$
- Range above tight for strongly convex regularizer on  $\square^n$ .

# Standard Methods + MPC

- General Problem:  $\min_{w \in X} f(w) + \phi(w)$
- For the case of MPC problems:
  - 1  $f$  is primal-dual gap  $Q$ .
  - 2  $w$  is joint primal-dual variable  $u$ .
  - 3  $X$  is joint domain  $\mathcal{U}(= \square^n \times \Delta^p \times \Delta^c)$ .
  - 4  $\phi$  is strongly convex regularizers  $\phi_1(x) + \phi_2(y) + \phi_3(z)$ .
- Algorithm of choice: Nesterov's Dual Extrapolation
- Range of regularizers  $\tilde{\Theta}(w\sqrt{n})$
- Range above tight for strongly convex regularizer on  $\square^n$ .

# Standard Methods + MPC

- General Problem:  $\min_{w \in X} f(w) + \phi(w)$
- For the case of MPC problems:
  - ①  $f$  is primal-dual gap  $Q$ .
  - ②  $w$  is joint primal-dual variable  $u$ .
  - ③  $X$  is joint domain  $\mathcal{U}(= \square^n \times \Delta^p \times \Delta^c)$ .
  - ④  $\phi$  is strongly convex regularizers  $\phi_1(x) + \phi_2(y) + \phi_3(z)$ .
- Algorithm of choice: Nesterov's Dual Extrapolation
- Range of regularizers  $\tilde{\Theta}(w\sqrt{n})$
- Range above tight for strongly convex regularizer on  $\square^n$ .

# Standard Methods + MPC

- General Problem:  $\min_{w \in X} f(w) + \phi(w)$
- For the case of MPC problems:
  - ①  $f$  is primal-dual gap  $Q$ .
  - ②  $w$  is joint primal-dual variable  $u$ .
  - ③  $X$  is joint domain  $\mathcal{U}(= \square^n \times \Delta^p \times \Delta^c)$ .
  - ④  $\phi$  is strongly convex regularizers  $\phi_1(x) + \phi_2(y) + \phi_3(z)$ .
- Algorithm of choice: Nesterov's Dual Extrapolation
- Range of regularizers  $\tilde{\Theta}(w\sqrt{n})$
- Range above tight for strongly convex regularizer on  $\square^n$ .

# Standard Methods + MPC

- General Problem:  $\min_{w \in X} f(w) + \phi(w)$
- For the case of MPC problems:
  - ①  $f$  is primal-dual gap  $Q$ .
  - ②  $w$  is joint primal-dual variable  $u$ .
  - ③  $X$  is joint domain  $\mathcal{U}(= \square^n \times \Delta^p \times \Delta^c)$ .
  - ④  $\phi$  is strongly convex regularizers  $\phi_1(x) + \phi_2(y) + \phi_3(z)$ .
- Algorithm of choice: Nesterov's Dual Extrapolation
- Range of regularizers  $\tilde{\Theta}(w\sqrt{n})$   

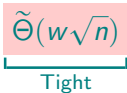

Tight
- Range above tight for strongly convex regularizer on  $\square^n$ .

# Area Convexity

Area convexity [Sherman 2017] :

- ① Is weaker than strong convexity. One can obtain area convex regularizer with small range over  $\ell_\infty$ -ball.
- ② Still good enough to obtain  $O(\text{range of regularizer} \times \frac{1}{\epsilon})$  convergence.

# Definition

- Strong convexity: for all  $t, u \in K$   
$$\phi\left(\frac{t+u}{2}\right) \leq \frac{1}{2}(\phi(t) + \phi(u)) - \frac{1}{2}\|t - u\|^2.$$
- **Def:** A function  $\phi$  is area convex w.r.t. matrix  $M$  on convex set  $K$  iff for any  $t, u, v \in K$ ,  
$$\phi\left(\frac{t+u+v}{3}\right) \leq \frac{1}{3}(\phi(t) + \phi(u) + \phi(v)) - \frac{1}{3\sqrt{3}} \underbrace{(v - u)^T M (u - t)}_{\text{'area' of } \Delta(tuv)}.$$

# Definition

- Strong convexity: for all  $t, u \in K$   
$$\phi\left(\frac{t+u}{2}\right) \leq \frac{1}{2}(\phi(t) + \phi(u)) - \frac{1}{2}\|t - u\|^2.$$
- **Def:** A function  $\phi$  is area convex w.r.t. matrix  $M$  on convex set  $K$  iff for any  $t, u, v \in K$ ,  
$$\phi\left(\frac{t+u+v}{3}\right) \leq \frac{1}{3}(\phi(t) + \phi(u) + \phi(v)) - \frac{1}{3\sqrt{3}} \underbrace{(v - u)^T M (u - t)}_{\text{'area' of } \Delta(tuv)}.$$



# An Example

- For any  $t, u \in K$ , area convex  $\phi$  requires mere convexity:  $\phi(\frac{t+u}{2}) \leq \frac{1}{2}(\phi(t) + \phi(u))$ .
- Consider  $\gamma(x, y) = yx \log x + 2y \log y$ .

Area convex w.r.t.  $\begin{bmatrix} 0 & -1 \\ 1 & 0 \end{bmatrix}$  on set  $0 \leq x, y \leq 1$ .

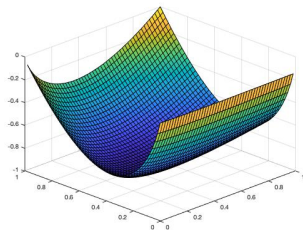

Figure: Auxiliary view

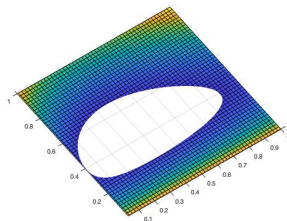

Figure: Level set  $\gamma(x, y) \leq -0.5$

# Area Convexity + MPC

- Use  $\phi : \mathcal{U} \rightarrow [-\rho, 0]$  as area convex regularizer w.r.t. a matrix depending on  $P$  and  $C$  on set  $\mathcal{U}$ .
- Area convexity: relaxed requirement, we can show  $\phi$  for which  $\rho = O(\|P\|_\infty \log p + \|C\|_\infty \log c)$
- This  $\rho$  is of order width,  $w$  of MPC, **gets rid of the  $\sqrt{n}$  factor.**

# Area Convexity + MPC

- Use  $\phi : \mathcal{U} \rightarrow [-\rho, 0]$  as area convex regularizer w.r.t. a matrix depending on  $P$  and  $C$  on set  $\mathcal{U}$ .
- Area convexity: relaxed requirement, we can show  $\phi$  for which  $\rho = O(\|P\|_\infty \log p + \|C\|_\infty \log c)$
- This  $\rho$  is of order width,  $w$  of MPC, gets rid of the  $\sqrt{n}$  factor.

# Area Convexity + MPC

- Use  $\phi : \mathcal{U} \rightarrow [-\rho, 0]$  as area convex regularizer w.r.t. a matrix depending on  $P$  and  $C$  on set  $\mathcal{U}$ .
- Area convexity: relaxed requirement, we can show  $\phi$  for which  $\rho = O(\|P\|_\infty \log p + \|C\|_\infty \log c)$
- This  $\rho$  is of order width,  $w$  of MPC, **gets rid of the  $\sqrt{n}$  factor.**

# Salient Features of Our Regularizer

- Standard regularization:  $\phi_1(x) + \phi_2(y)$ .
- Our regularization contains terms of the following type:

$$y_j P_{ij} x_j \log x_j.$$

- Interaction of dual variable  $y$  and primal variable  $x$ .
- Standard case: separate regularization of primal and dual variable as  $\phi_1(x)$  and  $\phi_2(y)$ .
- Depends on the problem matrix  $P$  and  $C$ . Explores the structure of the problem
- Independent to problem matrix  $P$  and  $C$ .

# Salient Features of Our Regularizer

- Standard regularization:  $\phi_1(x) + \phi_2(y)$ .
- Our regularization contains terms of the following type:  
$$y_j P_{ij} x_j \log x_j.$$
- Interaction of dual variable  $y$  and primal variable  $x$ .
- Standard case: separate regularization of primal and dual variable as  $\phi_1(x)$  and  $\phi_2(y)$ .
- Depends on the problem matrix  $P$  and  $C$ . Explores the structure of the problem
- Independent to problem matrix  $P$  and  $C$ .

# Salient Features of Our Regularizer

- Standard regularization:  $\phi_1(x) + \phi_2(y)$ .
- Our regularization contains terms of the following type:  
$$y_j P_{ij} x_j \log x_j.$$
- Interaction of dual variable  $y$  and primal variable  $x$ .
- Standard case: separate regularization of primal and dual variable as  $\phi_1(x)$  and  $\phi_2(y)$ .
- Depends on the problem matrix  $P$  and  $C$ . Explores the structure of the problem
- Independent to problem matrix  $P$  and  $C$ .

# Summary

- Strongly convex regularizer and  $\ell_\infty$ -barrier.
- Explicit area convex regularizer for MPC which circumvents the  $\ell_\infty$ -barrier.
  - ① Area convexity weaker than strong convexity. Range of the regularizer can be made  $\tilde{O}(w)$  on  $\ell_\infty$ -ball
  - ② Still suffices to obtain  $\tilde{O}(\frac{w}{\epsilon})$  convergence.
- See more details:  
Poster: #232  
Paper: *Faster width-dependent algorithms for mixed packing and covering LPs, arXiv 2019.*



# Summary

- Strongly convex regularizer and  $\ell_\infty$ -barrier.
- Explicit area convex regularizer for MPC which circumvents the  $\ell_\infty$ -barrier.
  - ① Area convexity weaker than strong convexity. Range of the regularizer can be made  $\tilde{O}(w)$  on  $\ell_\infty$ -ball
  - ② Still suffices to obtain  $\tilde{O}(\frac{w}{\epsilon})$  convergence.
- See more details:

Poster: #232

Paper: *Faster width-dependent algorithms for mixed packing and covering LPs, arXiv 2019.*

# Summary

- Strongly convex regularizer and  $\ell_\infty$ -barrier.
- Explicit area convex regularizer for MPC which circumvents the  $\ell_\infty$ -barrier.
  - ① Area convexity weaker than strong convexity. Range of the regularizer can be made  $\tilde{O}(w)$  on  $\ell_\infty$ -ball
  - ② Still suffices to obtain  $\tilde{O}(\frac{w}{\epsilon})$  convergence.
- See more details:  
Poster: #232  
Paper: *Faster width-dependent algorithms for mixed packing and covering LPs, arXiv 2019.*

Thanks!

Questions?
